# Supplementary material
Source: PubMed Central journal article supplement (PMC5941997)
Supplement: ba013953-suppl1.pdf [file ba013953-suppl1.pdf]

## **Supplemental information**

### **Sustained clonal hematopoiesis by HLA-lacking hematopoietic stem cells without driver mutations in aplastic anemia**

Tatsuya Imi,<sup>1</sup> † Takamasa Katagiri,<sup>2</sup> † Kazuyoshi Hosomichi,<sup>3</sup> Yoshitaka Zaimoku,<sup>1</sup>

Viet Hoang Nguyen,<sup>1</sup> Noriharu Nakagawa,<sup>1</sup> Atsushi Tajima,<sup>3</sup> Tetsuichi Yoshizato,<sup>4</sup>

Seishi Ogawa,<sup>4</sup> and Shinji Nakao<sup>1</sup>

† T.I. and T.K. equally contributed to this work.

<sup>1</sup>Department of Hematology and <sup>2</sup>Department of Clinical Laboratory Sciences, Graduate School of Medical Sciences, Kanazawa University, Japan; <sup>3</sup>Department of Bioinformatics and Genomics, Graduate School of Advanced Preventive Medical Sciences, Kanazawa University, Kanazawa, Japan; and <sup>4</sup>Pathology and Tumor Biology, Graduate School of Medicine, Kyoto University

Correspondence: Shinji Nakao, Department of Hematology, Graduate School of Medical Sciences, Kanazawa University, 13-1 Takaramachi, Kanazawa, Ishikawa

920-8640 Japan.

E-mail: [snakao8205@staff.kanazawa-u.ac.jp](mailto:snakao8205@staff.kanazawa-u.ac.jp).

Running Title: Clonal hematopoiesis by HLA(-) HSPCs in AA

## **SUPPLEMENTAL METHODS**

Next-generation sequencing data processing

Mutation calling

Reference

## **SUPPLEMENTAL DISCUSSION**

Escape hematopoiesis by a 6pLOH(+) clone that was forced to proliferate by a thrombopoietin  
receptor agonist

Reference

## **SUPPLEMENTAL TABLES**

Supplemental Table 1. The monoclonal antibodies used for flow cytometry

Supplemental Table 2. The genes analyzed by targeted sequencing

Supplemental Table 3. The somatic mutations of genes identified by targeted sequencing

Supplemental Table 4. The somatic mutations of genes identified by whole-exome sequencing

## **SUPPLEMENTAL FIGURES**

Supplemental Figure 1. HLA-A allele-lacking leukocytes and the gene analysis procedure

Supplemental Figure 2. A flow chart of the gene analyses

Supplemental Figure 3. Charts of the synonymous and nonsynonymous mutations of unknown significance detected by targeted sequencing and the VAFs of each mutation detected by targeted and whole-exome sequencing

Supplemental Figure 4. The clonal architecture of HLA(-) granulocytes deduced from the genetic analyses

Supplemental Figure 5. The clonal architecture of HLA(-) granulocytes deduced from the whole-exome sequencing

Supplemental Figure 6. Measuring the telomere length in AA patients by flow-FISH

## SUPPLEMENTAL METHODS

### **Next-generation sequencing data processing**

Paired-end 100-bp reads were mapped to the reference genome (GRCh37) using Burrows-Wheeler

Aligner (bwa) v.0.7.12.<sup>1</sup> bwa-generated SAM files were converted to the BAM format, then sorted

and indexed using SAM tools v.1.2.<sup>2</sup> Duplicated reads were marked with Picard v.1.52

(<https://github.com/broadinstitute/picard>).

### **Mutation calling**

The heuristic somatic mutation caller, VarScan 2,<sup>3</sup> was used for somatic mutation and LOH calling.

The mutations were reviewed using Unified Genotyper in the Genome Analysis Toolkit (GATK)

v3.4<sup>4</sup> and the alignment data were visually compared among granulocytes, T cells and buccal mucosa

cells using IGV.<sup>5</sup> The functional information on somatic mutations was annotated using

ANNOVAR.<sup>6</sup>

### **Reference**

1. Li H, Durbin R. Fast and accurate short read alignment with Burrows-Wheeler transform.

*Bioinformatics*. 2009;25(14):1754-60.

2. Li H, Handsaker B, Wysoker A, Fennell T, et al. The Sequence Alignment/Map format and

SAMtools. *Bioinformatics*. 2009;25(16):2078-9.

3. Koboldt DC, Zhang Q, Larson DE, et al. VarScan 2: somatic mutation and copy number alteration discovery in cancer by exome sequencing. *Genome Res.* 2012;22(3):568-76.
4. McKenna A, Hanna M, Banks E, et al. The Genome Analysis Toolkit: a MapReduce framework for analyzing next-generation DNA sequencing data. *Genome Res.* 2010;20(9):1297-303.
5. Robinson JT, Thorvaldsdóttir H, Winckler W, et al. Integrative genomics viewer. *Nat Biotechnol.* 2011;29(1):24-6.
6. Wang K, Li M, Hakonarson H. ANNOVAR: functional annotation of genetic variants from high-throughput sequencing data. *Nucleic Acids Res.* 2010;38(16):e164.

## SUPPLEMENTAL DISCUSSION

### **Escape hematopoiesis by a 6pLOH(+) clone that was forced to proliferate by a thrombopoietin receptor agonist**

Romiplostim was given to one patient (Case 12) who was refractory to platelet transfusions from random donors due to anti-HLA antibodies as an emergency measure after approval by an ethical committee of a local hospital, when the patient developed cerebral bleeding. Romiplostim miraculously restored the patient's hematopoiesis by a 6pLOH(+) HSPC without a help of immunosuppressive therapy (IST). Romiplostim is a thrombopoietin receptor agonist (TPO-RA) that is reported to be as efficacious in the treatment of acquired aplastic anemia (AA) as eltrombopag.<sup>1-3</sup> Case 12 achieved complete hematologic recovery with romiplostim alone despite the fact that no concomitant IST was given. The high number of somatic mutations with high variant allele frequencies (VAFs) detected in this patient might have developed in the process of the extensive proliferation of a 6pLOH(+) HSPC that was forced to proliferate due to the administration of romiplostim. This hypothesis needs to be studied by examining other AA patients with 6pLOH(+) HSPCs who are treated with TPO-RA alone using whole-exome sequencing (WES). The efficacy of romiplostim in the treatment of AA must be evaluated in a clinical trial setting.

### **Reference**

1. Lee JW, Jang JH, Lee SE, Jung CW, Park S. and Oh IH. Efficacy and safety of romiplostim in patients with aplastic anemia refractory to immunosuppressive therapy: 1-year interim analysis of phase 2 clinical trial [abstract]. *Blood*. 2016 128:3910
2. Townsley DM, Scheinberg P, Winkler T, et al. Eltrombopag added to standard immunosuppression for aplastic anemia. *N Engl J Med*. 2017;376(16):1540-1550.
3. Townsley DM, Cooper JN, Winkler T, et al. Myeloid neoplasm gene somatic mutations in patients with severe aplastic anemia treated with eltrombopag and standard immunosuppression [abstract]. *Blood*. 2016 128:727

## SUPPLEMENTAL TABLES

**Supplemental Table 1. The monoclonal antibodies used for flow cytometry**

| Antigen      | Isotype     | Conjugate   | Source          |
|--------------|-------------|-------------|-----------------|
| CD3          | Mouse IgG1  | PerCP-Cy5.5 | BD Biosciences  |
| CD3          | Mouse IgG1  | PE          | BD Biosciences  |
| CD19         | Mouse IgG1  | APC-Cy7     | Beckman Coulter |
| CD33         | Mouse IgG1  | APC         | Beckman Coulter |
| HLA-A2/28    | Mouse IgG2a | FITC        | One Lambda      |
| HLA-A2/28    | Mouse IgG2a | PE          | One Lambda      |
| HLA-A9/24    | Mouse IgG2b | FITC        | One Lambda      |
| HLA-A9/24    | Mouse IgG2b | Biotin      | One Lambda      |
| HLA-A30/31   | Mouse IgM   | Biotin      | One Lambda      |
| Streptavidin | NA          | PE          | BD Biosciences  |

Abbreviations: Ig, immunoglobulin; PerCP-Cy5.5, peridinin-chlorophyll proteins-Cy5.5 tandem; PE, phycoerythrin; APC, allophycocyanin; APC-Cy7, allophycocyanin-Cy7 tandem; FITC, fluorescein isothiocyanate.

**Supplemental Table 2. The genes analyzed by targeted sequencing**

| <b>Gene</b>   | <b>Function</b>       | <b>Reported disease</b> | <b>Reference</b>                                 |
|---------------|-----------------------|-------------------------|--------------------------------------------------|
| <i>ASXL1</i>  | Epigenetic regulation | MDS                     | Leukemia. 2014 Feb;28(2):241-7.                  |
| <i>ATRX</i>   | Epigenetic regulation | MDS                     | Leukemia. 2014 Feb;28(2):241-7.                  |
| <i>DNMT3A</i> | Epigenetic regulation | AML                     | Leukemia. 2014 Feb;28(2):241-7.                  |
| <i>EED</i>    | Epigenetic regulation | MDS                     | Blood. 2012 Feb 2;119(5):1208-13.                |
| <i>EZH2</i>   | Epigenetic regulation | MDS                     | Leukemia. 2014 Feb;28(2):241-7.                  |
| <i>TET2</i>   | Epigenetic regulation | MDS                     | Leukemia. 2014 Feb;28(2):241-7.                  |
| <i>ATM</i>    | Transcription         | MDS                     | Leukemia. 2014 Feb;28(2):241-7.                  |
| <i>BCOR</i>   | Transcription         | AML                     | Leukemia. 2014 Feb;28(2):241-7.                  |
| <i>BCORL1</i> | Transcription         | AML                     | Leukemia. 2014 Feb;28(2):241-7.                  |
| <i>PHF6</i>   | Transcription         | MDS                     | Leukemia. 2014 Feb;28(2):241-7.                  |
| <i>RUNX1</i>  | Transcription         | AML                     | Leukemia. 2014 Feb;28(2):241-7.                  |
| <i>TP53</i>   | Transcription         | MDS                     | Leukemia. 2014 Feb;28(2):241-7.                  |
| <i>WT1</i>    | Transcription         | AML                     | Leukemia. 2014 Feb;28(2):241-7.                  |
| <i>GNAS</i>   | Signal transduction   | MDS                     | Leukemia. 2014 Feb;28(2):241-7.                  |
| <i>KRAS</i>   | Signal transduction   | MDS                     | Leukemia. 2014 Feb;28(2):241-7.                  |
| <i>NF1</i>    | Signal transduction   | MDS                     | Leukemia. 2014 Feb;28(2):241-7.                  |
| <i>STAT3</i>  | Signal transduction   | PRCA/AA                 | Blood. 2013 Oct 3;122(14):2453-9.                |
| <i>MPL</i>    | Receptor              | MDS                     | Leukemia. 2014 Feb;28(2):241-7.                  |
| <i>POT1</i>   | Telomere related gene |                         | Genes Chromosomes Cancer. 2006 Mar;45(3):247-56. |
| <i>RAP1</i>   | Telomere related gene |                         | Genes Chromosomes Cancer. 2006 Mar;45(3):247-56. |
| <i>TERT</i>   | Telomere related gene | Dyskeratosis congenita  | Curr Opin Pediatr. 2012 Feb;24(1):23-32.         |
| <i>SRSF2</i>  | RNA splicing          | MDS                     | Nature. 2011 Sep 11;478(7367):64-9.              |
| <i>U2AF1</i>  | RNA splicing          | MDS                     | Nature. 2011 Sep 11;478(7367):64-9.              |

|               |                                           |         |                                                    |
|---------------|-------------------------------------------|---------|----------------------------------------------------|
| <i>ZRSR2</i>  | RNA splicing                              | MDS     | Nature. 2011 Sep 11;478(7367):64-9.                |
| <i>RAD21</i>  | Cohesin                                   | AML     | Nat Genet. 2013 Oct;45(10):1232-7.                 |
| <i>STAG2</i>  | Cohesin                                   | MDS     | Nat Genet. 2013 Oct;45(10):1232-7.                 |
| <i>LAMB4</i>  | Cell adhesion                             | MDS     | Leukemia. 2014 Feb;28(2):241-7.                    |
| <i>PEG3</i>   | Apoptosis                                 | AA      | N Engl J Med. 2015 Jul 2;373(1):35-47.             |
| <i>PIGA</i>   | GPI anchor                                | AA      | N Engl J Med. 2015 Jul 2;373(1):35-47.             |
| <i>SETBP1</i> | Bind to SET nuclear oncogene              | MDS     | Nat Genet. 2013 Aug;45(8):942-6.                   |
| <i>IDH2</i>   | Epigenetic regulation                     | AML     | Leukemia. 2014 Feb;28(2):241-7.                    |
| <i>RBBP4</i>  | Epigenetic regulation                     |         | Cancer Genet Cytogenet. 2003 Oct 15;146(2):89-101. |
| <i>SUZ12</i>  | Epigenetic regulation                     | MDS/MPD | Blood. 2012 Feb 2;119(5):1208-13.                  |
| <i>CUX1</i>   | Transcription                             | MDS     | Am J Hematol. 2012 Nov;87(11):1010-6.              |
| <i>CSMD1</i>  | Signal transduction                       | CMML    | Leukemia. 2016 Apr;30(4):906-13.                   |
| <i>JAK1</i>   | Signal transduction                       |         |                                                    |
| <i>JAK2</i>   | Signal transduction                       | MPD     | Leukemia. 2014 Feb;28(2):241-7.                    |
| <i>JAK3</i>   | Signal transduction                       |         |                                                    |
| <i>SH2B3</i>  | Signal transduction                       |         |                                                    |
| <i>SMC1A</i>  | Cohesin                                   | AML     | Nat Genet. 2013 Oct;45(10):1232-7.                 |
| <i>SMC3</i>   | Cohesin                                   | MDS     | Nat Genet. 2013 Oct;45(10):1232-7.                 |
| <i>BRCC3</i>  | Ubiquitination                            | MDS     | Leukemia. 2014 Feb;28(2):241-7.                    |
| <i>CBL</i>    | Ubiquitination                            | MDS     | Leukemia. 2014 Feb;28(2):241-7.                    |
| <i>DIS3</i>   | RNA processing and degradation            | AML     | Nature. 2012 Jan 11;481(7382):506-10.              |
| <i>RIT1</i>   | Signal transduction                       | CMML    | Leukemia. 2013 Sep;27(9):1943-6.                   |
| <i>PRPF8</i>  | RNA splicing                              | MDS     | Leukemia. 2014 Feb;28(2):241-7.                    |
| <i>DHX29</i>  | ATP-Dependent RNA Helicase                | AML     | Blood Cancer J. 2016 Dec 16;6(12):e510.            |
| <i>MECOM</i>  | transcriptional regulator and oncoprotein | MDS     |                                                    |
| <i>KDM6A</i>  | Histone Demethylase                       | APL     | J Clin Invest. 2011 Apr;121(4):1445-55.            |

|                                     |                                              |                            |                                          |
|-------------------------------------|----------------------------------------------|----------------------------|------------------------------------------|
| <i>ETV6</i>                         | Transcription factor                         | AL                         | Leukemia. 2014 Feb;28(2):241-7.          |
| <i>BRPF1</i>                        | Histone acetyltransferase activity           | AML                        | J Cell Physiol. 2014 Nov;229(11):1571-4. |
| <i>CCR9</i>                         | beta chemokine receptor family               |                            |                                          |
| <i>KDM3B</i>                        | Histone demethylase                          | AML                        | Leuk Lymphoma. 2018 Jan;59(1):204-213.   |
| <i>C11orf34</i><br>( <i>PLET1</i> ) | keratinocyte migration and cellular adhesion |                            |                                          |
| <i>IKZF1</i>                        | chromatin remodeling                         | ALL                        |                                          |
| <i>ERBB2</i>                        | viral oncogene homolog 2                     | breast cancer, brain tumor |                                          |
| <i>SLIT1</i>                        | molecular guidance in cellular migration     |                            |                                          |
| <i>LRCH1</i>                        | Structure protein                            | knee osteoarthritis        |                                          |
| <i>DPP4</i>                         | adenosine deaminase-binding protein          |                            |                                          |
| <i>PRR5L</i>                        | Associates with the mTORC2 complex           |                            |                                          |
| <i>RFX1</i>                         | HLA class II expression                      |                            |                                          |

Abbreviations: MDS, myelodysplastic syndrome; AML, acute myelogenous leukemia; PRCA, pure red cell aplasia; AA, acquired aplastic anemia; DKC, dyskeratosis congenital; MPD, myeloproliferative disease; CMML, chronic myelomonocytic leukemia; AL, acute leukemia; ALL, acute lymphoblastic leukemia.

**Supplemental Table 3. The somatic mutations of genes identified by targeted sequencing**

| Case number | Gene          | Chromosome | Exonic function     | Position     | Genome change | Amino acid change | VAF  | dbSNP138    | COSMIC ID              |
|-------------|---------------|------------|---------------------|--------------|---------------|-------------------|------|-------------|------------------------|
| 1           | <i>DNMT3A</i> | 2          | nonsynonymous SNV   | NM_153759    | C2077T        | R693C             | 0.44 | rs377577594 | COSM1166704, COSM53042 |
| 1           | <i>ZRSR2</i>  | X          | stopgain            | NM_005089    | C505T         | R169X             | 0.36 |             | COSM1716885            |
| 1           | <i>TET2</i>   | 4          | frameshift deletion | NM_001127208 | 452_458 del   | V151fs            | 0.04 |             | Novel                  |
| 1           | <i>TET2</i>   | 4          | frameshift deletion | NM_001127208 | 2045_2051 del | H682fs            | 0.17 |             | Novel                  |
| 2           | <i>DNMT3A</i> | 2          | nonsynonymous SNV   | NM_153759    | A1637G        | Y546C             | 0.19 | rs147828672 | COSM133126             |
| 2           | <i>RFX1</i>   | 19         | synonymous SNV      | NM_002918    | G918C         | T306T             | 0.15 |             | Novel                  |
| 3           | <i>PRR5L</i>  | 11         | nonsynonymous SNV   | NM_001160168 | G211A         | E71K              | 0.12 |             | Novel                  |
| 3           | <i>LRCH1</i>  | 13         | frameshift deletion | NM_001164213 | 1734_1737 del | E578fs            | 0.12 |             | Novel                  |
| 3           | <i>DPP4</i>   | 2          | synonymous SNV      | NM_001935    | G375A         | R125R             | 0.2  |             | Novel                  |
| 4           | <i>CBL</i>    | 11         | nonsynonymous SNV   | NM_005188    | C1624A        | L542I             | 0.33 |             | Novel                  |

**Supplemental Table 4. The somatic mutations of genes identified by whole-exome sequencing**

| Case number | Gene           | Chromosome | Exonic function   | Position     | Genome change | Amino acid change | VAF  | dbSNP138    | COSMIC ID   |
|-------------|----------------|------------|-------------------|--------------|---------------|-------------------|------|-------------|-------------|
| 12          | <i>SPEG</i>    | 2          | synonymous SNV    | NM_005876    | C2367A        | A789A             | 0.22 |             | Novel       |
| 12          | <i>DCAF4</i>   | 14         | synonymous SNV    | NM_001163508 | G276A         | T92T              | 0.24 |             | Novel       |
| 12          | <i>MYSM1</i>   | 1          | stopgain          | NM_001085487 | T2427G        | Y809X             | 0.36 |             | Novel       |
| 12          | <i>MYSM1</i>   | 1          | nonsynonymous SNV | NM_001085487 | T2425C        | Y809H             | 0.36 |             | Novel       |
| 12          | <i>COX4I2</i>  | 20         | nonsynonymous SNV | NM_032609    | C415T         | R139W             | 0.39 | rs200392726 | Novel       |
| 12          | <i>OR2AT4</i>  | 11         | nonsynonymous SNV | NM_001005285 | G913T         | A305S             | 0.41 |             | Novel       |
| 12          | <i>PPAP2B</i>  | 1          | nonsynonymous SNV | NM_003713    | T284C         | I95T              | 0.44 |             | Novel       |
| 12          | <i>FAM154B</i> | 15         | nonsynonymous SNV | NM_001008226 | C689T         | P230L             | 0.44 |             | Novel       |
| 12          | <i>PEX5</i>    | 12         | nonsynonymous SNV | NM_000319    | G1319A        | G440D             | 0.45 |             | Novel       |
| 12          | <i>GPR56</i>   | 16         | nonsynonymous SNV | NM_001145773 | T694G         | S232A             | 0.46 |             | Novel       |
| 12          | <i>SRRM2</i>   | 16         | nonsynonymous SNV | NM_016333    | C1975T        | R659C             | 0.47 |             | Novel       |
| 12          | <i>NLRP4</i>   | 19         | nonsynonymous SNV | NM_134444    | G863A         | R288Q             | 0.47 |             | Novel       |
| 12          | <i>SP5</i>     | 2          | nonsynonymous SNV | NM_001003845 | T826C         | C276R             | 0.51 |             | Novel       |
| 12          | <i>HSPG2</i>   | 1          | synonymous SNV    | NM_005529    | C6849T        | G2283G            | 0.51 |             | Novel       |
| 12          | <i>FER1L5</i>  | 2          | nonsynonymous SNV | NM_001113382 | T4855C        | Y1619H            | 0.51 |             | Novel       |
| 13          | <i>OLFM4</i>   | 13         | nonsynonymous SNV | NM_006418    | G419A         | R140Q             | 0.21 |             | Novel       |
| 13          | <i>CRTAC1</i>  | 10         | nonsynonymous SNV | NM_001206528 | T2C           | M1T               | 0.22 |             | Novel       |
| 13          | <i>SCG2</i>    | 2          | synonymous SNV    | NM_003469    | G306A         | R102R             | 0.22 |             | COSM1017067 |
| 13          | <i>GPT</i>     | 8          | nonsynonymous SNV | NM_005309    | A929T         | H310L             | 0.23 |             | Novel       |
| 13          | <i>ZNF623</i>  | 8          | synonymous SNV    | NM_014789    | T42A          | T14T              | 0.24 |             | Novel       |

|    |                 |    |                   |              |        |        |      |  |                                             |
|----|-----------------|----|-------------------|--------------|--------|--------|------|--|---------------------------------------------|
| 13 | <i>SERPINF1</i> | 17 | nonsynonymous SNV | NM_002615    | T20C   | L7P    | 0.26 |  | COSM1317826,<br>COSM1317825,<br>COSM3401548 |
| 13 | <i>ZNF462</i>   | 9  | nonsynonymous SNV | NM_021224    | G4982A | R1661Q | 0.47 |  | Novel                                       |
| 14 | <i>NPY2R</i>    | 4  | synonymous SNV    | NM_000910    | C547T  | L183L  | 0.47 |  | Novel                                       |
| 14 | <i>ZNF502</i>   | 3  | nonsynonymous SNV | NM_001134441 | A1099T | I367F  | 0.47 |  | Novel                                       |
| 14 | <i>GRID2IP</i>  | 7  | synonymous SNV    | NM_001145118 | G1464A | T488T  | 0.51 |  | Novel                                       |
| 14 | <i>DHX35</i>    | 20 | nonsynonymous SNV | NM_001190809 | C20T   | P7L    | 0.53 |  | Novel                                       |
| 15 | <i>AKAP10</i>   | 17 | nonsynonymous SNV | NM_007202    | A449C  | H150P  | 0.28 |  | Novel                                       |
| 15 | <i>SERPINA9</i> | 14 | synonymous SNV    | NM_001284275 | C636T  | G212G  | 0.42 |  | Novel                                       |
| 15 | <i>ATXNIL</i>   | 16 | nonsynonymous SNV | NM_001137675 | G298A  | V100M  | 0.45 |  | Novel                                       |
| 15 | <i>MSH3</i>     | 5  | synonymous SNV    | NM_002439    | A444G  | Q148Q  | 0.48 |  | Novel                                       |
| 15 | <i>EDEM3</i>    | 1  | nonsynonymous SNV | NM_025191    | A2713G | K905E  | 0.51 |  | Novel                                       |

SUPPLEMENTAL FIGURES

Supplemental Figure 1. HLA-A allele-lacking leukocytes and the gene analysis procedure

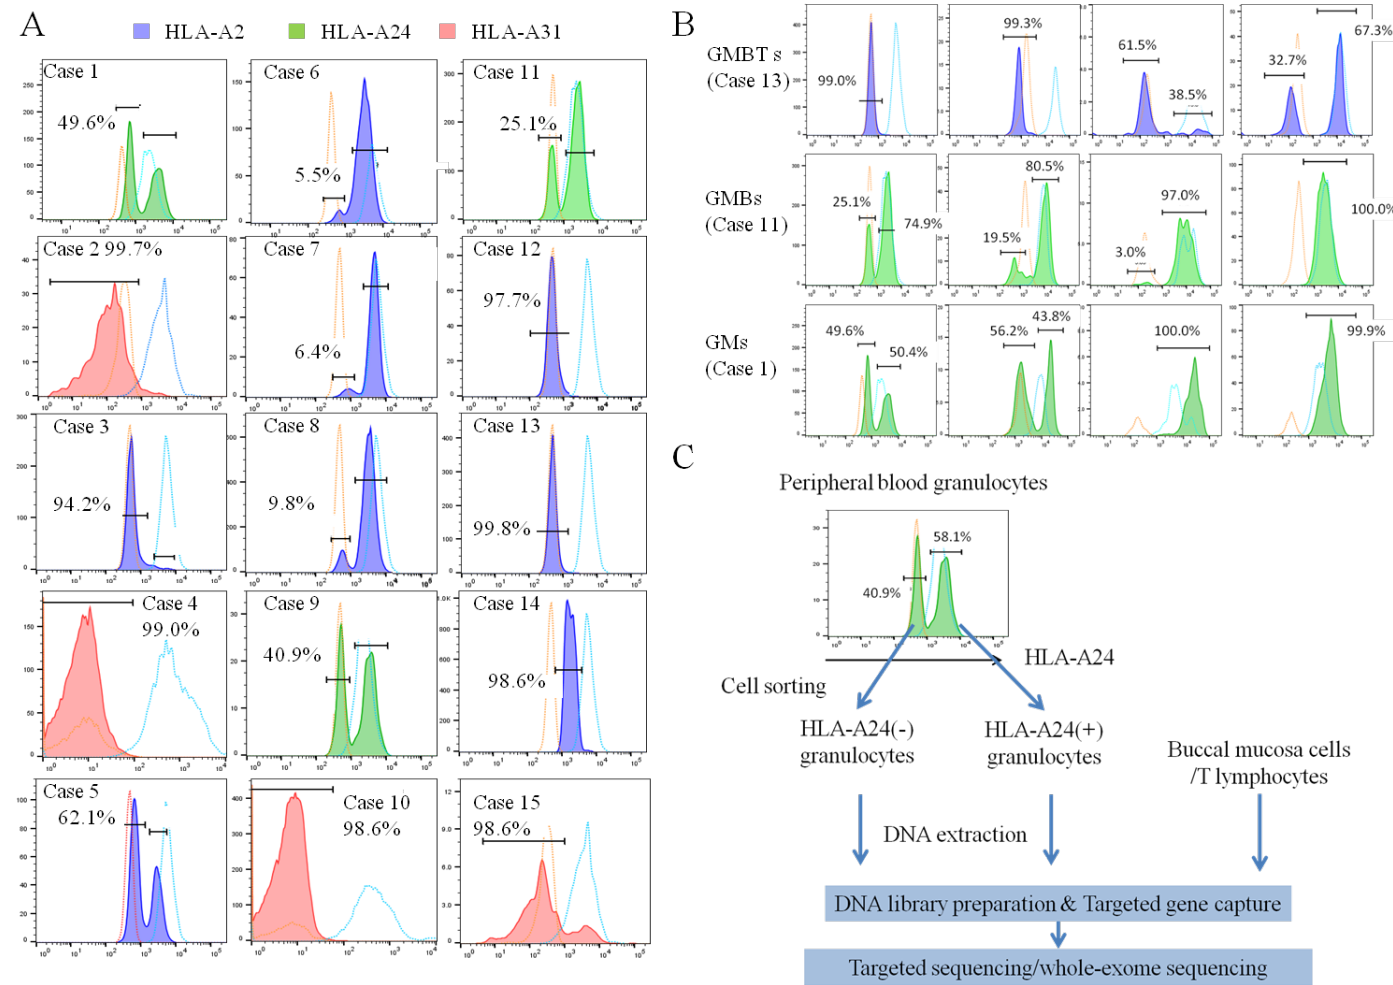

A: HLA(-) granulocytes and their percentages in each case. The open histogram represents the HLA-A allele expression of normal controls. B: The lineage patterns of HLA-A allele-lacking leukocytes of the representative cases. G, granulocytes; M, monocytes; B, B lymphocytes, T, T lymphocytes. C: The procedure for sorting and sequencing of HLA-A24(-) and HLA-A24(+) granulocytes.

**Supplemental Figure 2. A flow chart of the gene analyses**

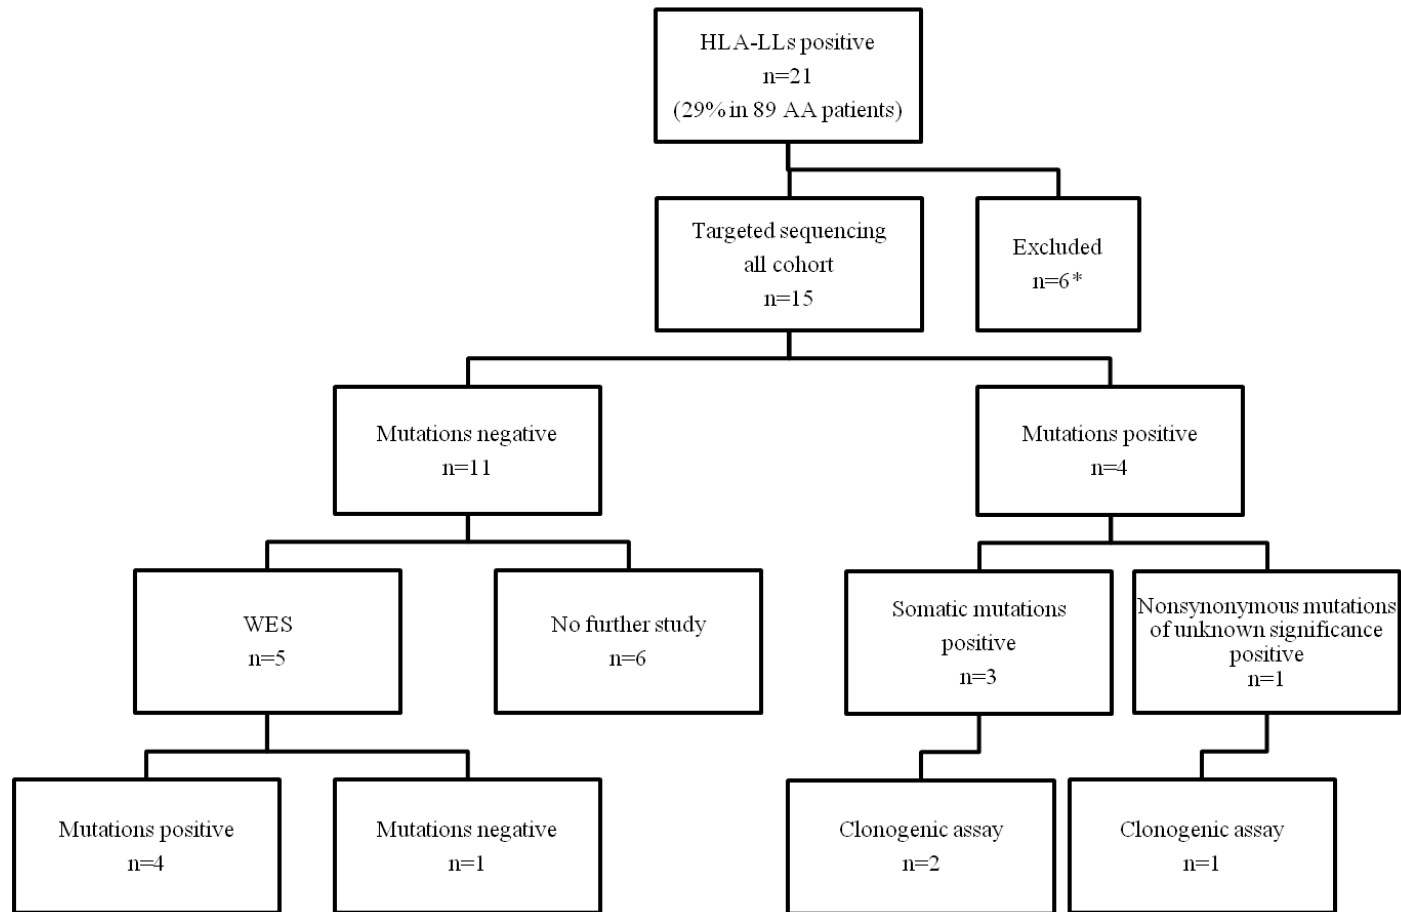

\* Six patients were excluded from this study for the following reasons: three had HLA(-) cells only in B cells, one died of infection before sampling for this study, one had a disease history of <1 year, and the percentage of HLA(-) granulocyte was too low (<1%) to obtain a sufficient amount of DNA for the

analysis in one.

**Supplemental Figure 3. Charts of the synonymous and nonsynonymous mutations of unknown significance detected by targeted sequencing and the VAFs of each mutation detected by targeted and whole-exome sequencing.**

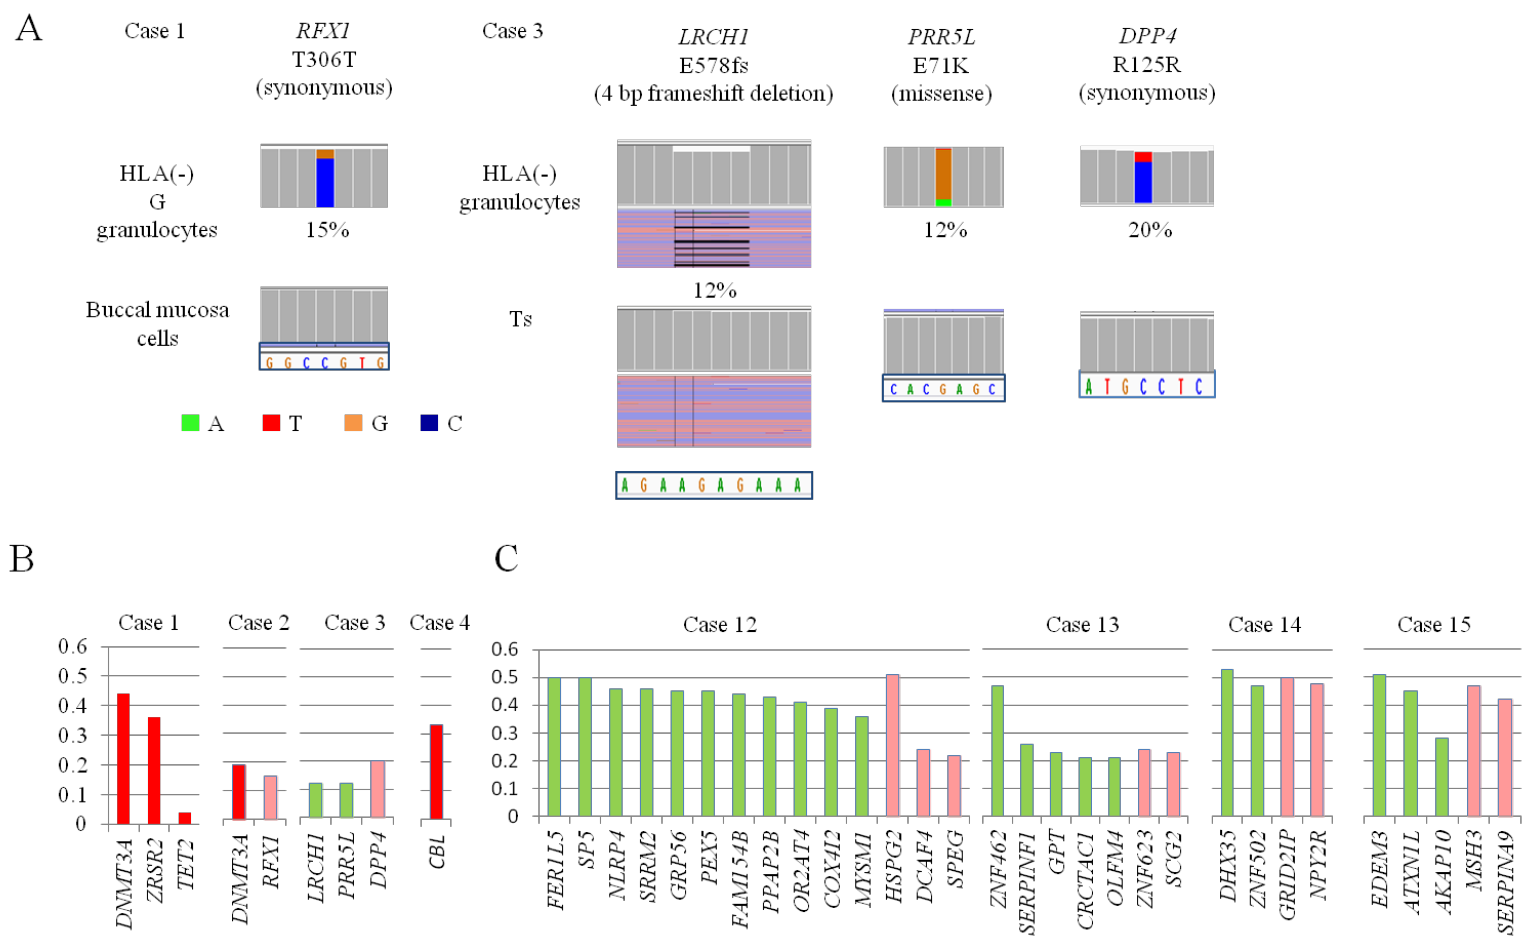

A: Four synonymous and nonsynonymous mutations of unknown significance were detected by targeted sequencing. The synonymous mutation in *RFXI* was only detected in the HLA(-) granulocytes of Case 1. An *LRCH1* frameshift mutation, *PRR5L* missense mutation and *DPP4* synonymous mutation were also only detected in the HLA(-) granulocytes of Case 3. B: The variant allele frequencies (VAFs) of each somatic mutation in targeted sequencing. C: The VAFs of each gene mutation in four cases were detected by whole-exome sequencing. Somatic mutations (red), nonsynonymous mutations of unknown significance (green) and synonymous mutations (pink) are shown.

**Supplemental Figure 4. The clonal architecture of HLA(-) granulocytes deduced from the genetic analyses.**

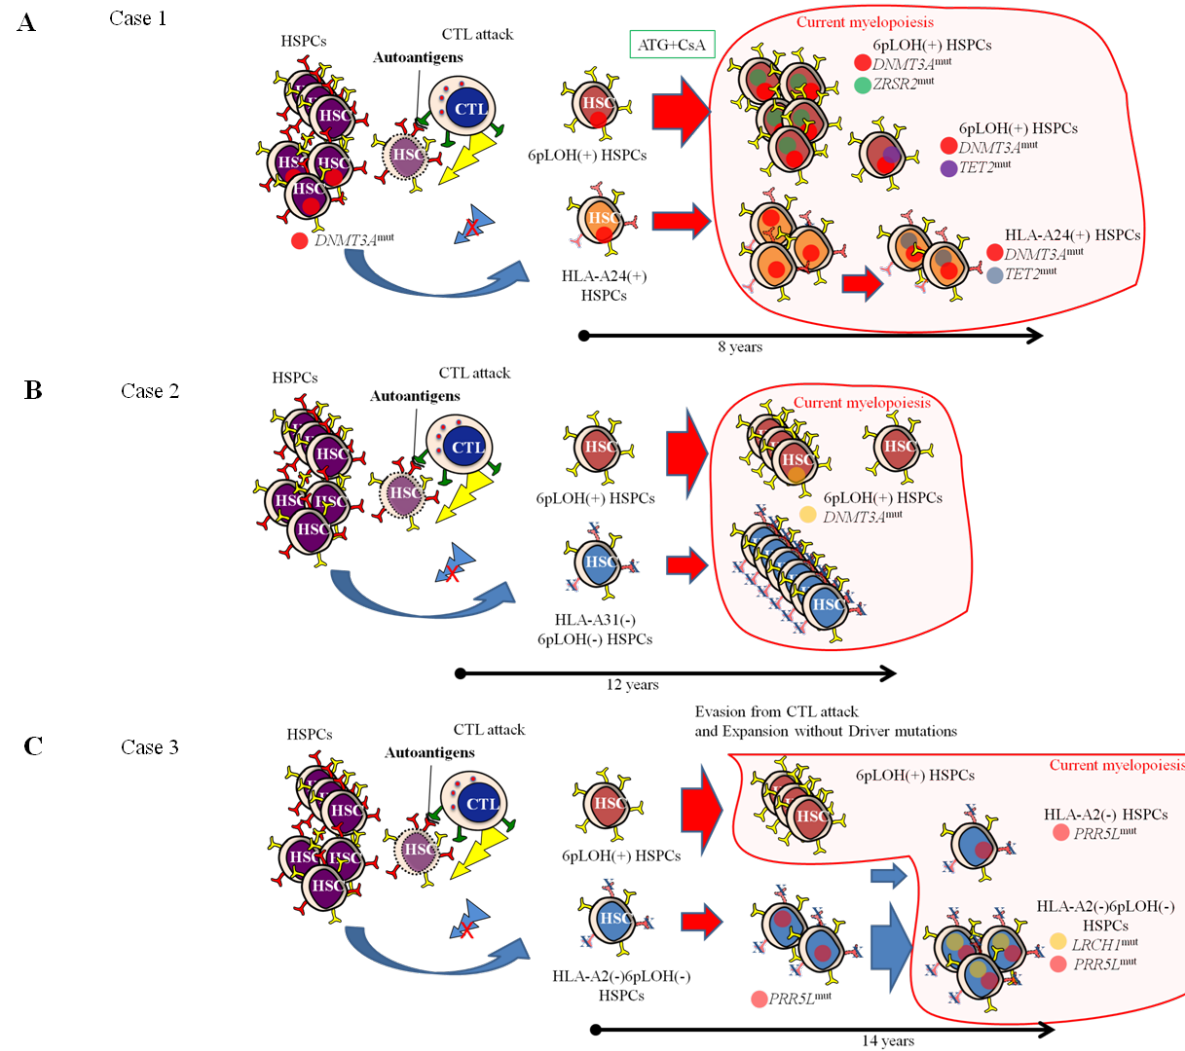

A: 6pLOH occurred in a *DNMT3A<sup>mut</sup>* HSPC, and the 6pLOH(+) *DNMT3A<sup>mut</sup>* HSPC survived the CTL attack when the patient developed AA and proliferated to support Case 1's hematopoiesis. In the process of clonal proliferation of the 6pLOH(+) *DNMT3A<sup>mut</sup>* HSPC, a *ZRSR2* or *TET2* mutation occurred in the 6pLOH(+) *DNMT3A<sup>mut</sup>* HSPC, leading to acceleration of the clonal proliferation of 6pLOH(+) *DNMT3A<sup>mut</sup>ZRSR2<sup>mut</sup>* and 6pLOH(+) *DNMT3A<sup>mut</sup>TET2<sup>mut</sup>* HSPCs. A 6pLOH(-) *DNMT3A<sup>mut</sup>* HSPC also underwent a *TET2* mutation and clonal proliferation independently after escaping from the CTL attack.

B: 6pLOH occurred in an HSPC, and the 6pLOH(+) HSPC survived the CTL attack when the patient developed AA and proliferated to support Case 2's hematopoiesis. In the process of clonal proliferation of the 6pLOH(+) HSPC, *DNMT3A* mutation occurred in the 6pLOH(+) HSPC, and the 6pLOH(+) *DNMT3A<sup>mut</sup>* HSPC gradually proliferated. An HLA-A31(-) 6pLOH(-) HSPC that also survived the CTL attack partly supported Case 2's hematopoiesis for a long time.

C: 6pLOH occurred in an HSPC, and the 6pLOH(+) HSPC survived the CTL attack when the patient developed AA and proliferated to support Case 3's hematopoiesis without undergoing secondary mutations. An HLA-A2(-) 6pLOH(-) HSPC underwent a *PRR5L* mutation, and a subclone of the HLA-A2(-) 6pLOH(-) *PRR5L<sup>mut</sup>* HSPC underwent an *LRCH1* mutation.

**Supplemental Figure 5. The clonal architecture of HLA(-) granulocytes deduced from the whole-exome sequencing.**

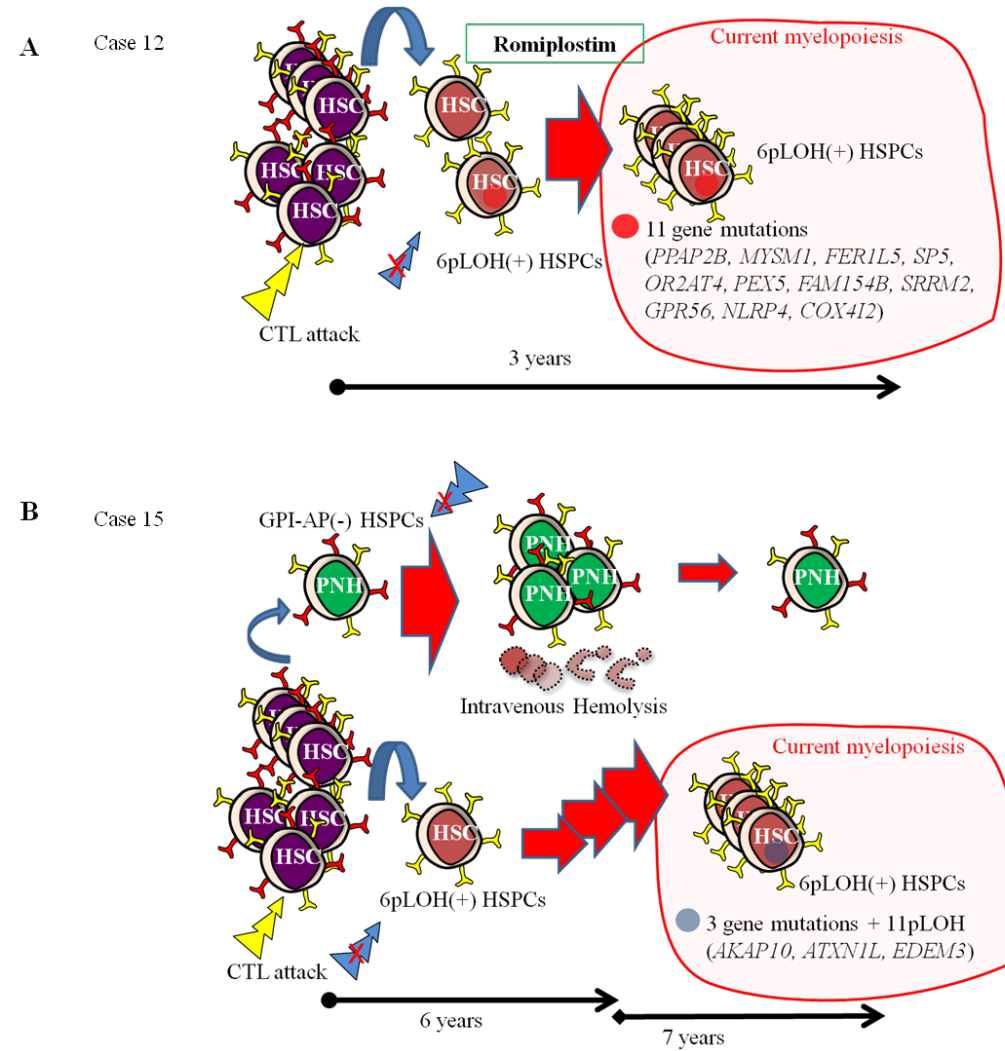

A: A few 6pLOH(+) HSPCs survived the CTL attack when Case 12 developed severe AA, and one of the mutated HSPCs that carried multiple passenger gene mutations was stimulated to grow by romiplostim, which had been administered to support the patient's hematopoiesis.

B: Both GPI-AP(-) and 6pLOH(+) HSPCs survived when the patient developed AA, and only GPI-AP(-) HSPCs supported Case 15's hematopoiesis for the initial six years. When the PNH clone(s) spontaneously regressed, 6pLOH(+) HSPCs that carried three passenger mutations started to grow for some reason to support the patient's hematopoiesis.

Supplemental Figure 6. Measuring the telomere length in AA patients by flow-FISH

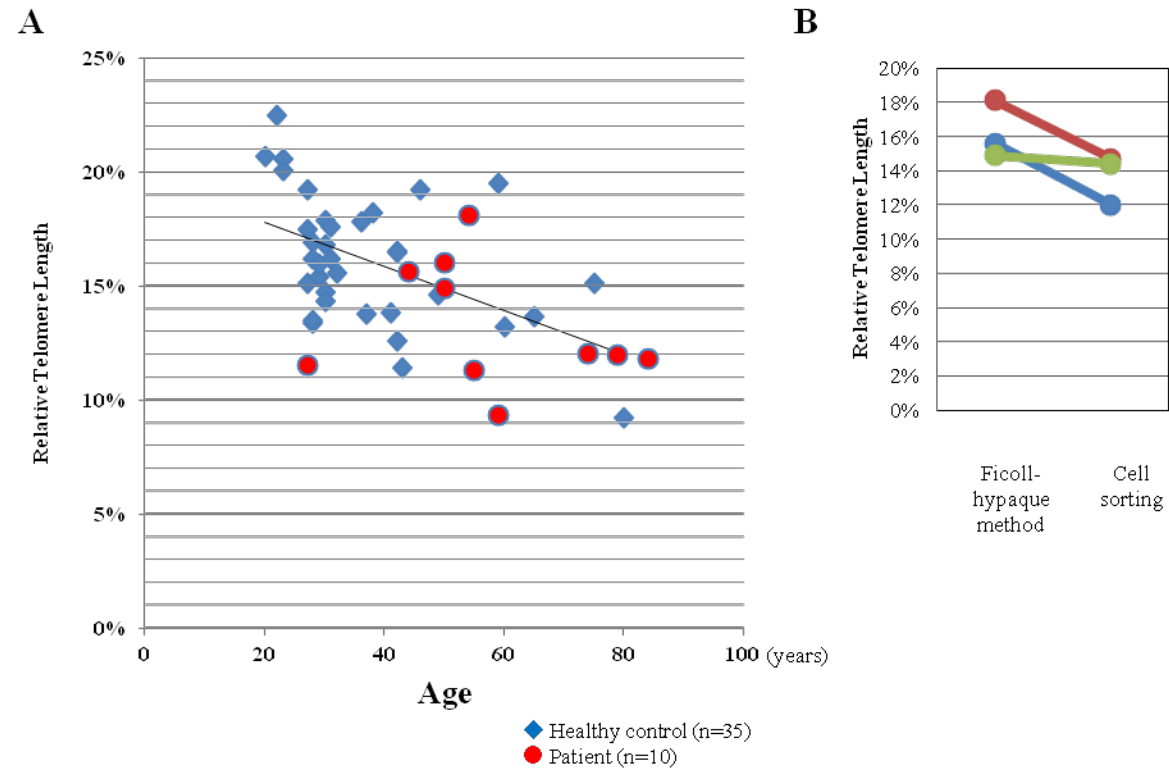

A. The relative telomere length of granulocytes from healthy individuals of different ages (n=35) and AA patients possessing HLA(-) granulocytes (n=10).

B. A comparison of the telomere length between granulocytes collected by the Ficoll-Hypaque method and those collected by cell sorting.
